# Supplementary material for: Nano-infrared imaging of metal insulator transition in few-layer 1T-TaS2
Source: publisher site journal article supplement (doi:10.1515/nanoph-2022-0750), 2023-03-23
Supplement: Supplementary file [file j_nanoph-2022-0750_suppl_001.pdf]

# Nano-infrared imaging of metal insulator transition in few-layer 1T-TaS<sub>2</sub>

## Supplementary Information

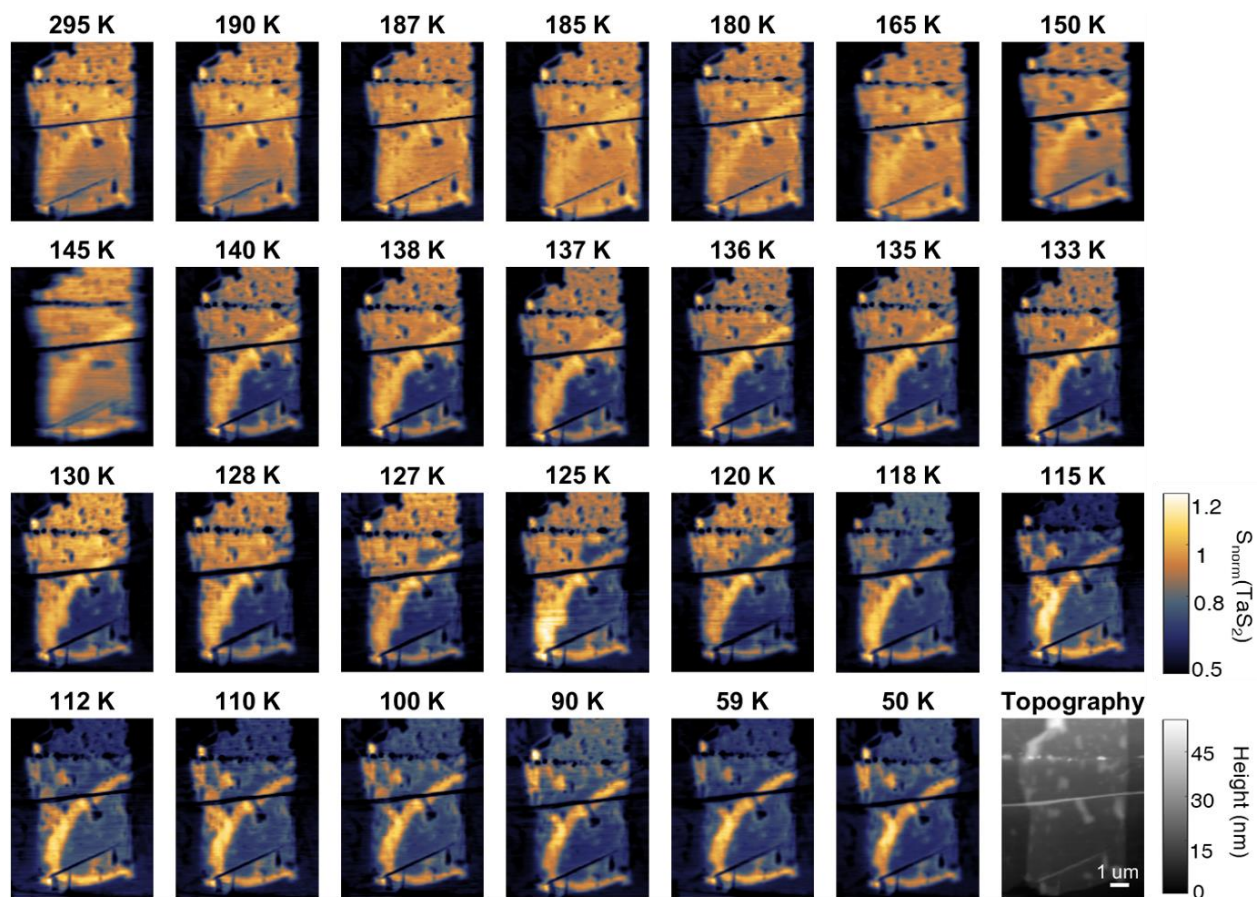

**Supplementary Figure 1.** Near field amplitude images of 1T-TaS<sub>2</sub> taken upon cooling. The scale bar is the same for all images.

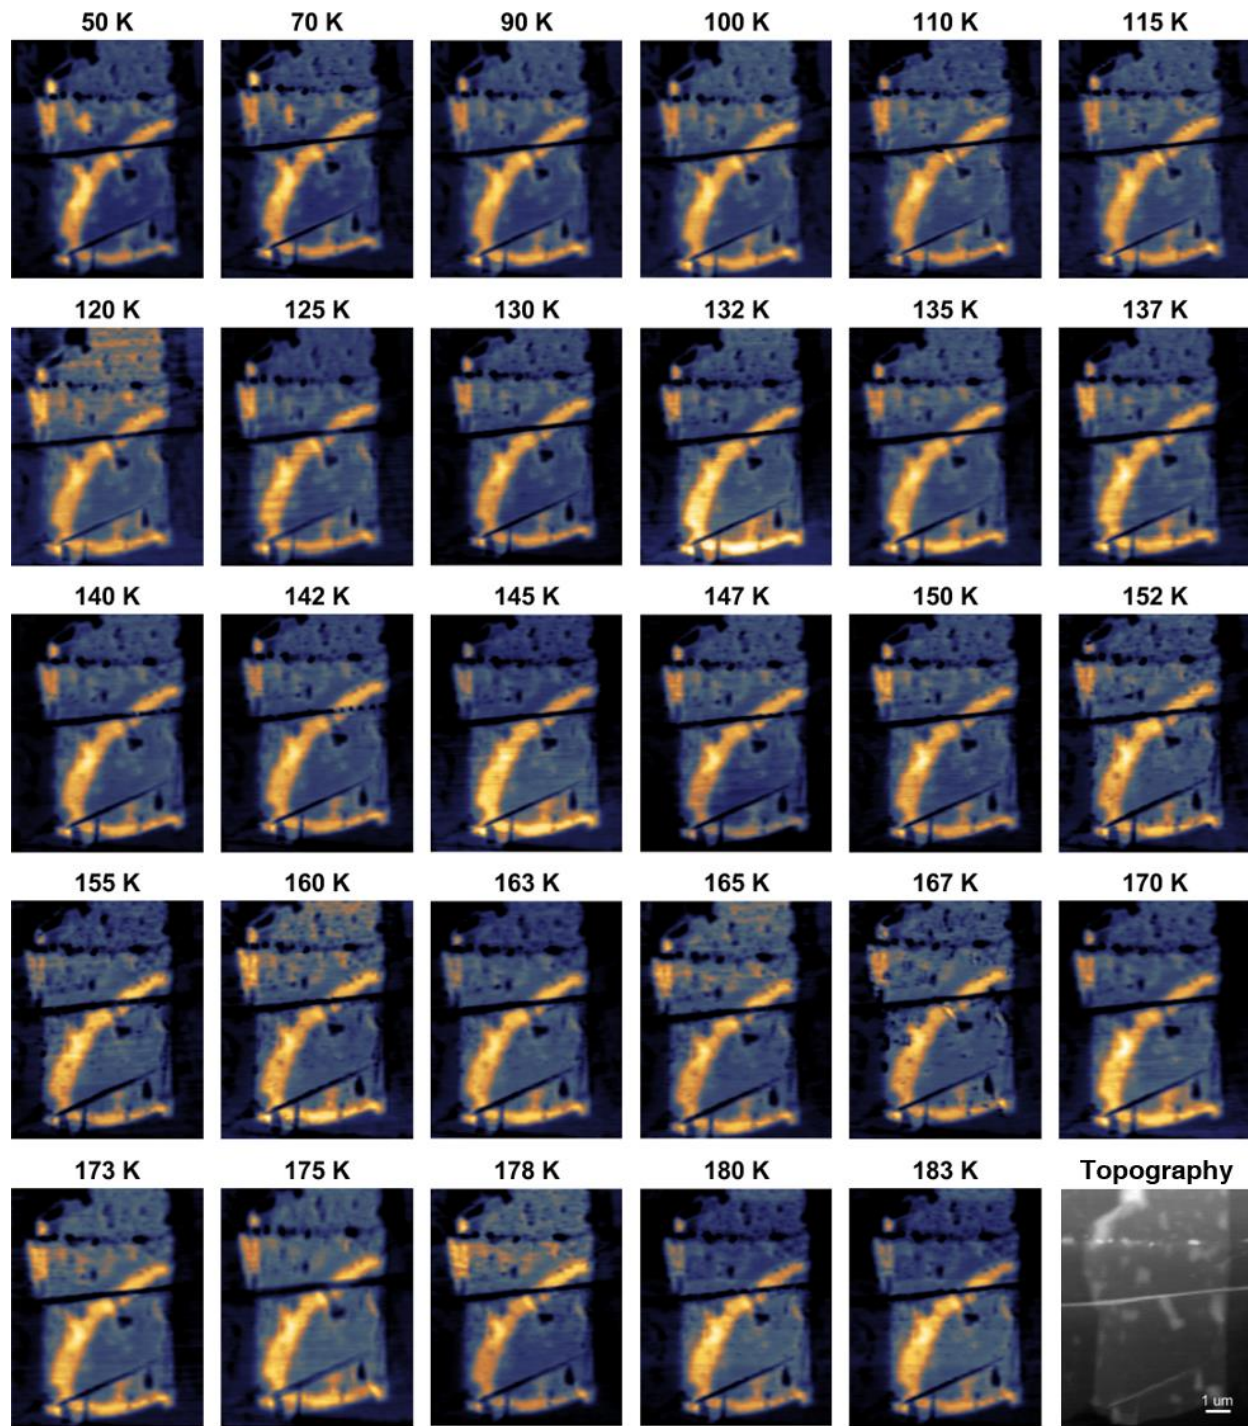

**Supplementary Figure 2.** Near field amplitude images of 1T-TaS<sub>2</sub> taken upon heating. The scale bar is the same for all images as in Fig. S1. No clear transition is seen up to 183K.

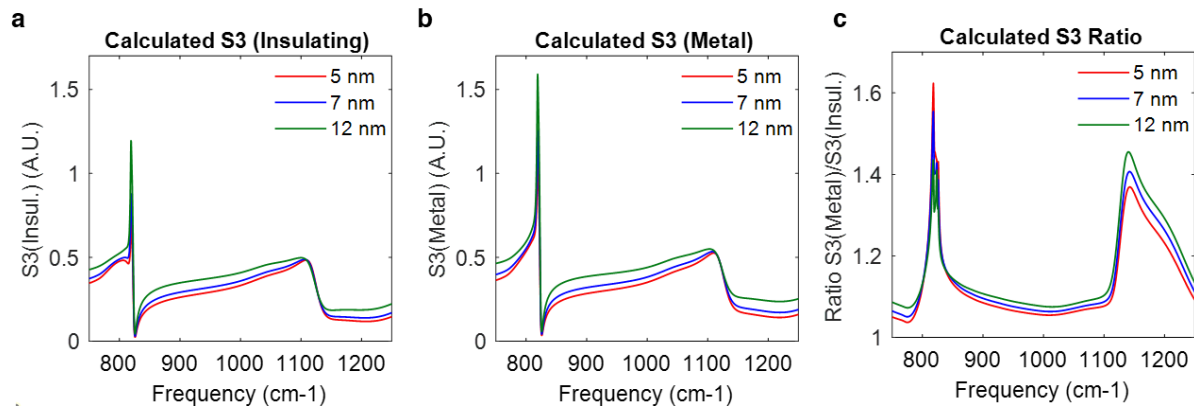

**Supplementary Figure 3.** Calculated near-field signals at **a)** room temperature in the metallic state, and at **b)** low temperature in the insulating CCDW state, and **c)** the ratio for samples with 1T-TaS<sub>2</sub> flakes of thicknesses of 5nm, 7nm, and 12nm. Arbitrary units are used in a and b. All calculations in main text assume a thickness of 7nm.

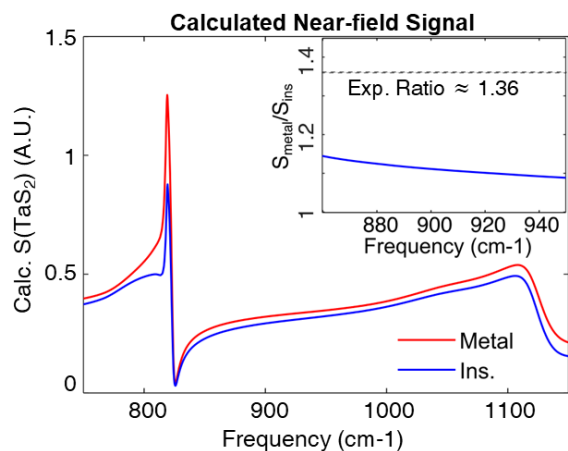

**Supplementary Figure 4.** Calculated near-field signal normalised to gold  $S(1T\text{-TaS}_2)/S(\text{Au})$  of the metallic and insulating state over an extended frequency range. Inset: contrast of the near-field signal between the metallic and insulating state. The experimentally measured ratio  $S_{\text{metal}}/S_{\text{insulator}} \approx 1.36$  is marked with a dashed line.

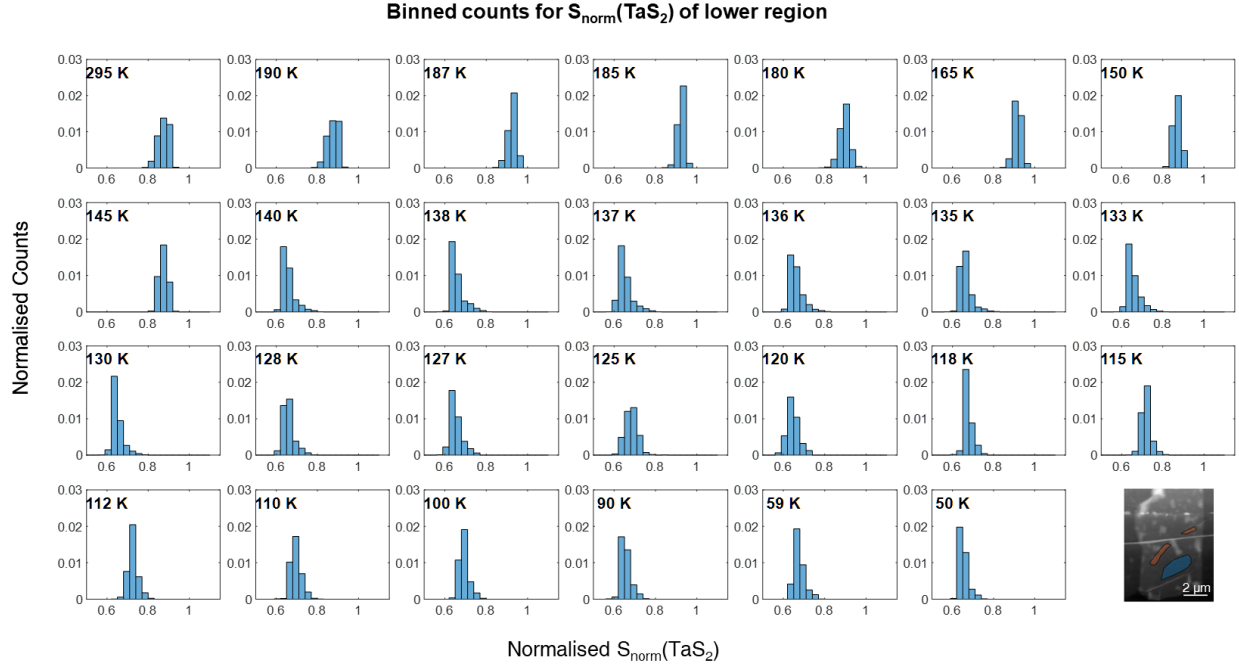

**Supplementary Figure 5.** Individual histogram plots for the lower region marked in blue in the lower right panel, as also presented in Fig. 4A.

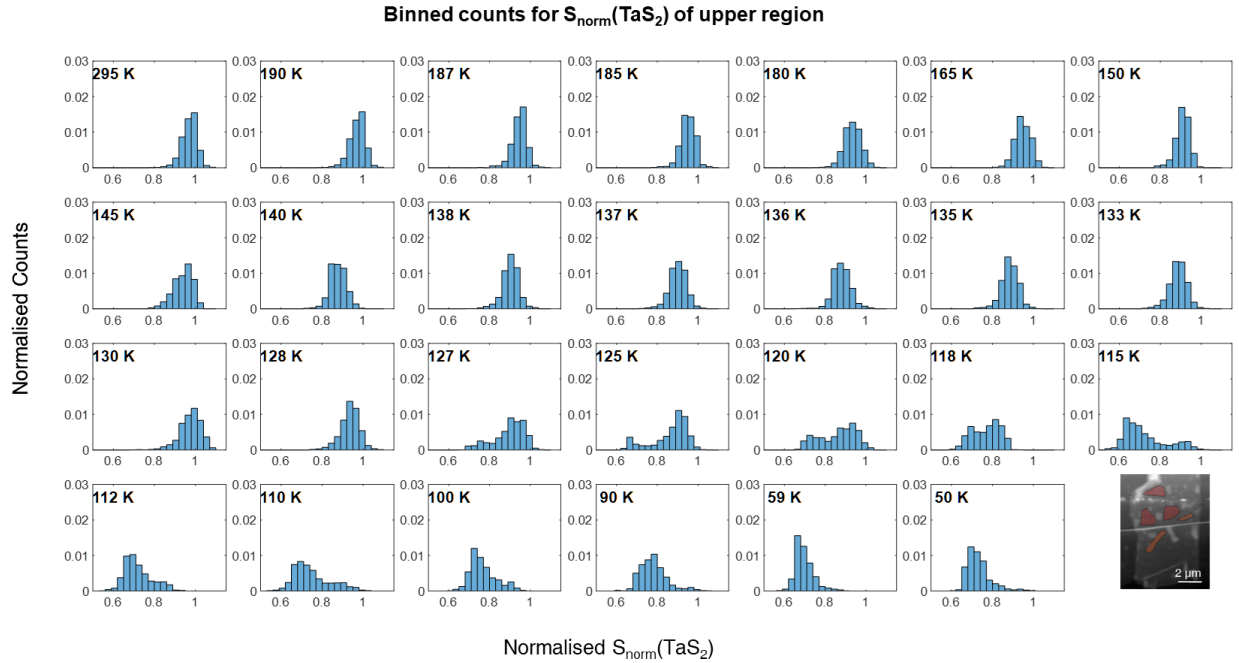

**Supplementary Figure 6.** Individual histogram plots for the upper region marked in red in the lower right panel.



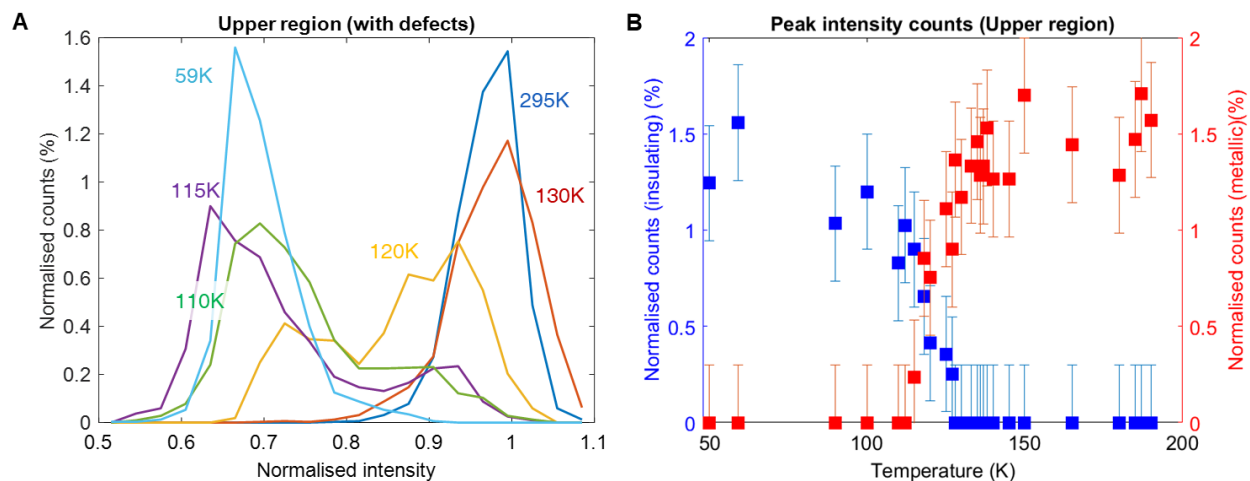

**Supplementary Figure 7. A**, Normalised counts of  $S_{\text{norm}}$  for the upper region as marked in red in Figure S6. With decreasing temperature, there is a shift in the fraction of metallic to insulating regions, but it is unclear if there is a temperature dependence of the peak center. **B**, The normalised counts of the metallic (red) and insulating (blue) peaks for the defect rich upper region.
